# Supplementary material
Source: ML conference proceedings conference paper supplement (https://proceedings.neurips.cc/paper_files/paper/2016/hash/955a1584af63a546588caae4d23840b3-Abstract.html)
Supplement: Supplementary file [file 955a1584af63a546588caae4d23840b3-Supplemental.zip]

---

# The Limits of Learning with Missing Data (Supplement)

---

**Brian Bullins**      **Elad Hazan**  
Princeton University  
Princeton, NJ  
{bbullins, ehazan}@cs.princeton.edu

**Tomer Koren**  
Google Brain  
Mountain View, CA  
tkoren@google.com

## A Proofs

### A.1 Proof of Theorem 3 (Remaining)

**Lemma 9.** *For any integers  $0 \leq k < d$  it holds that*

$$\sum_{i=0}^k (-1)^i \binom{d}{i} = (-1)^k \binom{d-1}{k}.$$

*Proof.* By induction. Clearly the  $k = 0$  case holds. Now, suppose for some  $0 \leq k < d - 1$ ,

$$\sum_{i=0}^k (-1)^i \binom{d}{i} = (-1)^k \binom{d-1}{k}.$$

Then, we have

$$\sum_{i=0}^{k+1} (-1)^i \binom{d}{i} = (-1)^k \binom{d-1}{k} + (-1)^{k+1} \binom{d}{k+1} = (-1)^{k+1} \left( \binom{d}{k+1} - \binom{d-1}{k} \right) = (-1)^{k+1} \binom{d-1}{k+1},$$

as desired.  $\square$

### Proof of Lemma 7

*Proof.* The  $\mathcal{D}_2$  case uses a line of reasoning similar to that we used for  $\mathcal{D}_1$ . Note that

$$\partial L_{\mathcal{D}_2}(\mathbf{w}) = \frac{1}{2^{d-1}} \sum_{\mathbf{x} \in \mathcal{X}_2} \partial \ell(\mathbf{w}^\top \mathbf{x} - 1) = \frac{1}{2^{d-1}} \sum_{\mathbf{x} \in \mathcal{X}_2} \text{sign}(\mathbf{w}^\top \mathbf{x} - 1) \cdot \mathbf{x}$$

Now, letting  $\mathbf{w}_2^* = \frac{2}{d+2} \cdot \mathbf{1}_d$ , we have that

$$\begin{aligned}
\partial L_{\mathcal{D}_2}(\mathbf{w}_2^*) &= \frac{1}{2^{d-1}} \sum_{\mathbf{x} \in \mathcal{X}_2} \partial \ell(\mathbf{w}_2^{*\top} \mathbf{x} - 1) = \frac{1}{2^{d-1}} \sum_{\mathbf{x} \in \mathcal{X}_2} \text{sign}(\mathbf{w}_2^{*\top} \mathbf{x} - 1) \cdot \mathbf{x} \\
&= \frac{1}{2^{d-1}} \left( \sum_{\substack{\mathbf{x} \in \mathcal{X}_2, \\ \|\mathbf{x}\|_1 < \frac{d+2}{2}}} \text{sign}(\mathbf{w}_2^{*\top} \mathbf{x} - 1) \cdot \mathbf{x} \right. \\
&\quad \left. + \sum_{\substack{\mathbf{x} \in \mathcal{X}_2, \\ \|\mathbf{x}\|_1 = \frac{d+2}{2}}} \text{sign}(\mathbf{w}_2^{*\top} \mathbf{x} - 1) \cdot \mathbf{x} + \sum_{\substack{\mathbf{x} \in \mathcal{X}_2, \\ \|\mathbf{x}\|_1 > \frac{d+2}{2}}} \text{sign}(\mathbf{w}_2^{*\top} \mathbf{x} - 1) \cdot \mathbf{x} \right) \\
&= \frac{1}{2^{d-1}} \left( \sum_{\substack{\mathbf{x} \in \mathcal{X}_2, \\ \|\mathbf{x}\|_1 = \frac{d+2}{2}}} \text{sign}(0) \cdot \mathbf{x} + \sum_{\substack{\mathbf{x} \in \mathcal{X}_2, \\ \|\mathbf{x}\|_1 > \frac{d+2}{2}}} \mathbf{x} - \sum_{\substack{\mathbf{x} \in \mathcal{X}_2, \\ \|\mathbf{x}\|_1 < \frac{d+2}{2}}} \mathbf{x} \right) \\
&= \frac{1}{2^{d-1}} \left( \sum_{\substack{\mathbf{x} \in \mathcal{X}_2, \\ \|\mathbf{x}\|_1 = \frac{d+2}{2}}} \text{sign}(0) \cdot \mathbf{x} + \sum_{i=\frac{d}{4}+1}^{\frac{d}{2}-1} \binom{d-1}{2i} \cdot \mathbf{1}_d - \sum_{i=0}^{\frac{d}{4}-1} \binom{d-1}{2i} \cdot \mathbf{1}_d \right) \\
&= \frac{1}{2^{d-1}} \left( \sum_{\substack{\mathbf{x} \in \mathcal{X}_2, \\ \|\mathbf{x}\|_1 = \frac{d+2}{2}}} \text{sign}(0) \cdot \mathbf{x} + \sum_{i=0}^{\frac{d}{2}-2} (-1)^{i+1} \binom{d-1}{i} \cdot \mathbf{1}_d \right) \\
&= \frac{1}{2^{d-1}} \left( \sum_{\substack{\mathbf{x} \in \mathcal{X}_2, \\ \|\mathbf{x}\|_1 = \frac{d+2}{2}}} \text{sign}(0) \cdot \mathbf{x} - \binom{d-2}{\frac{d}{2}-2} \cdot \mathbf{1}_d \right).
\end{aligned}$$

Similar to before, we have

$$\partial L_{\mathcal{D}_2}(\mathbf{w}_2^*) = \left\{ \frac{1}{2^{d-1}} \left( X\mathbf{r} - \binom{d-2}{\frac{d}{2}-2} \cdot \mathbf{1}_d \right) \mid \mathbf{r} \in [-1, 1]^m \right\}$$

and so choosing  $\mathbf{r}_1 = \mathbf{0}$  and  $\mathbf{r}_2 = \mathbf{1}_d$  and following the same reasoning as in Lemma 6, we have that both of the vectors

$$\mathbf{h}^+ = \frac{1}{2^{d-1}} \binom{d-2}{\frac{d}{2}-1} \cdot \mathbf{1}_d, \quad \mathbf{h}^- = -\frac{1}{2^{d-1}} \binom{d-2}{\frac{d}{2}-2} \cdot \mathbf{1}_d$$

belong to the subdifferential set  $\partial L_{\mathcal{D}_2}(\mathbf{w}_2^*)$ , and thus so does the zero vector  $\mathbf{0}$ , that lies on the segment connecting  $\mathbf{h}^+$  and  $\mathbf{h}^-$ . Again, using  $\sqrt{2\pi n} \left(\frac{n}{e}\right)^n \leq n! \leq e\sqrt{n} \left(\frac{n}{e}\right)^n$ , we can show that

$$\frac{1}{2^{d-1}} \binom{d-2}{\frac{d}{2}-1} \geq \frac{1}{2^{d-1}} \left( \frac{\sqrt{2\pi(d-2)} \left(\frac{d-2}{e}\right)^{d-2}}{e^2 \left(\frac{d}{2}-1\right) \left(\frac{d-2}{2e}\right)^{d-2}} \right) = \frac{\sqrt{2\pi}}{e^2 \sqrt{d-2}} \geq \frac{\sqrt{2\pi}}{e^4 \sqrt{d}},$$

and

$$-\frac{1}{2^{d-1}} \binom{d-2}{\frac{d}{2}-2} \leq -\frac{1}{2^{d-1}} \left( \frac{\sqrt{2\pi(d-2)} \left(\frac{d-2}{e}\right)^{d-2}}{e^2 \sqrt{\frac{d-4}{2}} \sqrt{\frac{d}{2}} \left(\frac{d-4}{2e}\right)^{\frac{d}{2}-2} \left(\frac{d}{2e}\right)^{\frac{d}{2}}} \right) \leq -\frac{\sqrt{2\pi}}{e^4 \sqrt{d}}.$$

Letting  $\mathbf{h}^* = -\frac{\sqrt{2\pi}}{e^4 \sqrt{d}} \cdot \mathbf{1}_d$ , we again have that  $\pm \mathbf{h}^* \in \partial L_{\mathcal{D}_2}(\mathbf{w}_2^*)$ . From this point, it should be clear that the analysis for the  $\mathcal{D}_2$  case is identical to that of the  $\mathcal{D}_1$  case, and so the lemma holds for  $\mathcal{D}_2$  as well.  $\square$

## A.2 Proof of Theorem 5

Similar to the proof of Theorem 3, the main idea is to construct two distributions that are indistinguishable to a learner who can observe no more than  $d-1$  attributes of any sample, but whose respective sets of  $\varepsilon$ -optimal classifiers are disjoint.

To prove the lower bound, we again consider two distributions  $\mathcal{D}_1$  and  $\mathcal{D}_2$ . Let  $\mathcal{X}_1 = \{\mathbf{x} = (x_1, \dots, x_d) \mid \mathbf{x} \in \{0, 1\}^d, \|\mathbf{x}\|_1 \equiv 0 \pmod{2}\}$  and  $\mathcal{X}_2 = \{\mathbf{x} = (x_1, \dots, x_d) \mid \mathbf{x} \in \{0, 1\}^d, \|\mathbf{x}\|_1 \equiv 1 \pmod{2}\}$ . We also let  $\mathcal{X}'_1 = \frac{1}{\sqrt{d}}\mathcal{X}_1$  and  $\mathcal{X}'_2 = \frac{1}{\sqrt{d}}\mathcal{X}_2$ . Furthermore, let  $\mathcal{Y}_1 = \mathcal{Y}_2 = \{-\frac{1}{\sqrt{d}}, \frac{1}{\sqrt{d}}\}$ . Let  $(\mathbf{x}, y) \sim \mathcal{D}_1$  be such that  $\mathbf{x}$  and  $y$  are sampled independently, and such that  $\mathbf{x}$  is sampled uniformly from  $\mathcal{X}'_1$  while  $y = \frac{1}{\sqrt{d}}$  w.p.  $\frac{1}{2} + \delta$  and  $y = -\frac{1}{\sqrt{d}}$  w.p.  $\frac{1}{2} - \delta$ , where  $\delta = \frac{1}{2^{d+1}}$ . We construct the distribution  $\mathcal{D}_2$  in a similar manner.

Again, we observe that for any choice of  $k$  attributes,  $k \leq d-1$ , the marginal distributions are identical in both  $\mathcal{D}_1$  and  $\mathcal{D}_2$ . Let  $\ell(y_t \cdot \mathbf{w}^\top \mathbf{x}) = \max\{0, 1 - y \cdot \mathbf{w}^\top \mathbf{x}\}$ , and let

$$L_{\mathcal{D}_1}(\mathbf{w}) = \frac{1}{2^{d-1}\sqrt{d}} \sum_{\mathbf{x} \in \mathcal{X}'_1} \left( \frac{1}{2} + \delta \right) \max\{0, 1 - \mathbf{w}^\top \mathbf{x}\} + \left( \frac{1}{2} - \delta \right) \max\{0, 1 + \mathbf{w}^\top \mathbf{x}\}$$

and

$$L_{\mathcal{D}_2}(\mathbf{w}) = \frac{1}{2^{d-1}\sqrt{d}} \sum_{\mathbf{x} \in \mathcal{X}'_2} \left( \frac{1}{2} + \delta \right) \max\{0, 1 - \mathbf{w}^\top \mathbf{x}\} + \left( \frac{1}{2} - \delta \right) \max\{0, 1 + \mathbf{w}^\top \mathbf{x}\}.$$

The goal is to show that the sets of  $\varepsilon$ -optimal classifiers for each of these minimization problems are disjoint for small enough  $\varepsilon$ . We begin by characterizing supersets of these  $\varepsilon$ -optimal sets which are easier to compare. Once established, we then show that these sets are disjoint.

**Lemma 10.** *Let  $\mathbf{w}_1^* = \frac{1}{d} \cdot \mathbf{1}_d$ , and let  $S_1 = \left\{ \mathbf{w} : \left| \frac{1}{2^{d+1}\sqrt{d}} \cdot \mathbf{1}_d^\top (\mathbf{w} - \mathbf{w}_1^*) \right| \leq \varepsilon \right\}$ . Then the entire set of  $\varepsilon$ -optimal classifiers for  $L_{\mathcal{D}_1}$  is contained in  $S_1$ .*

*Proof.* Notice that since  $\max\{x, y\} = \frac{1}{2}(x + y + |y - x|)$ , we can rewrite  $L_{\mathcal{D}_1}$  as

$$L_{\mathcal{D}_1}(\mathbf{w}) = \frac{1}{2^d \sqrt{d}} \sum_{\mathbf{x} \in \mathcal{X}'_1} \left( \frac{1}{2} + \delta \right) (1 - \mathbf{w}^\top \mathbf{x} + |1 - \mathbf{w}^\top \mathbf{x}|) + \left( \frac{1}{2} - \delta \right) (1 + \mathbf{w}^\top \mathbf{x} + |1 + \mathbf{w}^\top \mathbf{x}|)$$

Note that

$$\begin{aligned} \partial L_{\mathcal{D}_1}(\mathbf{w}) &= \frac{1}{2^d} \sum_{\mathbf{x} \in \mathcal{X}'_1} \left( \frac{1}{2} + \delta \right) (-\mathbf{x} - \text{sign}(1 - \mathbf{w}^\top \mathbf{x}) \cdot \mathbf{x}) + \left( \frac{1}{2} - \delta \right) (\mathbf{x} + \text{sign}(1 + \mathbf{w}^\top \mathbf{x}) \cdot \mathbf{x}) \\ &= \frac{1}{2^d \sqrt{d}} \sum_{\mathbf{x} \in \mathcal{X}'_1} -2\delta \mathbf{x} - \left( \frac{1}{2} + \delta \right) \text{sign}(1 - \mathbf{w}^\top \mathbf{x}) \cdot \mathbf{x} + \left( \frac{1}{2} - \delta \right) \text{sign}(1 + \mathbf{w}^\top \mathbf{x}) \cdot \mathbf{x} \\ &= \frac{1}{\sqrt{d}} \left( -\frac{\delta}{2} \mathbf{1}_d - \frac{1}{2^d} \sum_{\mathbf{x} \in \mathcal{X}'_1} \left( \frac{1}{2} + \delta \right) \text{sign}(1 - \mathbf{w}^\top \mathbf{x}) \cdot \mathbf{x} + \left( \frac{1}{2} - \delta \right) \text{sign}(1 + \mathbf{w}^\top \mathbf{x}) \cdot \mathbf{x} \right) \end{aligned}$$

Let  $\mathbf{x}^* = \mathbf{1}_d$ , and let  $\mathbf{w}_1^* = \frac{1}{d} \mathbf{1}_d$ . Note that  $\mathbf{x}^* \in \mathcal{X}_1$ . Taken together, we see that

$$\begin{aligned} \partial L_{\mathcal{D}_1}(\mathbf{w}_1^*) &= \frac{1}{\sqrt{d}} \left( -\frac{\delta}{2} \mathbf{1}_d - \frac{1}{2^d} \left( \frac{1}{2} + \delta \right) \text{sign}(1 - \frac{1}{d} \mathbf{1}_d^\top \mathbf{x}^*) \cdot \mathbf{x}^* \right. \\ &\quad \left. - \frac{1}{2^d} \sum_{\mathbf{x} \in \mathcal{X}'_1 \setminus \mathbf{x}^*} \left( \frac{1}{2} + \delta \right) \text{sign}(1 - \frac{1}{d} \mathbf{1}_d^\top \mathbf{x}) \cdot \mathbf{x} + \frac{1}{2^d} \sum_{\mathbf{x} \in \mathcal{X}'_1} \left( \frac{1}{2} - \delta \right) \text{sign}(1 + \frac{1}{d} \mathbf{1}_d^\top \mathbf{x}) \cdot \mathbf{x} \right) \\ &= \frac{1}{\sqrt{d}} \left( -\frac{\delta}{2} \mathbf{1}_d - \frac{1}{2^d} \left( \frac{1}{2} + \delta \right) \text{sign}(0) \cdot \mathbf{1}_d - \left( \frac{1}{4} - \frac{1}{2^d} \right) \left( \frac{1}{2} + \delta \right) \cdot \mathbf{1}_d + \frac{1}{4} \left( \frac{1}{2} - \delta \right) \cdot \mathbf{1}_d \right) \\ &= \frac{1}{\sqrt{d}} \left( -\delta + (1 - \text{sign}(0)) \left( \frac{1 + 2\delta}{2^{d+1}} \right) \right) \cdot \mathbf{1}_d \end{aligned}$$

Since  $\delta = \frac{1}{2^{d+1}}$ , and choosing  $1 \in \text{sign}(0)$ , we have that

$$\mathbf{h}^- = -\frac{1}{2^{d+1}\sqrt{d}} \cdot \mathbf{1}_d \in \partial L_{\mathcal{D}_1}(\mathbf{w}_1^*).$$

On the other hand, choosing  $-1 \in \text{sign}(0)$ , we have

$$\mathbf{h}^+ = \frac{1}{\sqrt{d}} \left( \frac{1}{2^{d+1}} + \frac{1}{4^d} \right) \cdot \mathbf{1}_d \in \partial L_{\mathcal{D}_1}(\mathbf{w}_1^*).$$

Since  $\mathbf{0}_d$  can be written as a convex combination of  $\mathbf{h}^-$  and  $\mathbf{h}^+$ , we know that  $\mathbf{w}_1^*$  is a minimizer of  $L_{\mathcal{D}_1}(\mathbf{w})$ . By the subgradient inequality, we know that for all  $\mathbf{y} \in \text{dom} L_{\mathcal{D}_1}$ ,

$$L_{\mathcal{D}_1}(\mathbf{y}) - L_{\mathcal{D}_1}(\mathbf{w}_1^*) \geq \frac{1}{2^{d+1}\sqrt{d}} \cdot \mathbf{1}_d^\top (\mathbf{y} - \mathbf{w}_1^*)$$

and

$$L_{\mathcal{D}_1}(\mathbf{y}) - L_{\mathcal{D}_1}(\mathbf{w}_1^*) \geq -\frac{1}{2^{d+1}\sqrt{d}} \cdot \mathbf{1}_d^\top (\mathbf{y} - \mathbf{w}_1^*)$$

which taken together implies that

$$L_{\mathcal{D}_1}(\mathbf{y}) - L_{\mathcal{D}_1}(\mathbf{w}_1^*) \geq \left| \frac{1}{2^{d+1}\sqrt{d}} \cdot \mathbf{1}_d^\top (\mathbf{y} - \mathbf{w}_1^*) \right|.$$

Now, letting  $S_1 = \left\{ \mathbf{w} : \left| \frac{1}{2^{d+1}\sqrt{d}} \cdot \mathbf{1}_d^\top (\mathbf{w} - \mathbf{w}_1^*) \right| \leq \varepsilon \right\}$ , we may observe that the entire set of  $\varepsilon$ -optimal classifiers for  $L_{\mathcal{D}_1}$  is contained in  $S_1$ .  $\square$

**Lemma 11.** *Let  $\mathbf{w}_2^* = \frac{1}{d-1} \cdot \mathbf{1}_d$ , and let  $S_2 = \left\{ \mathbf{w} : \left| \frac{1}{2^{d+1}\sqrt{d}} \cdot \mathbf{1}_d^\top (\mathbf{w} - \mathbf{w}_2^*) \right| \leq \varepsilon \right\}$ . Then the entire set of  $\varepsilon$ -optimal classifiers for  $L_{\mathcal{D}_2}$  is contained in  $S_2$ .*

*Proof.* The proof is nearly identical to that of Lemma 10. We can again rewrite  $L_{\mathcal{D}_2}$  as

$$L_{\mathcal{D}_2}(\mathbf{w}) = \frac{1}{2^d \sqrt{d}} \sum_{\mathbf{x} \in \mathcal{X}_2} \left( \frac{1}{2} + \delta \right) (1 - \mathbf{w}^\top \mathbf{x} + |1 - \mathbf{w}^\top \mathbf{x}|) + \left( \frac{1}{2} - \delta \right) (1 + \mathbf{w}^\top \mathbf{x} + |1 + \mathbf{w}^\top \mathbf{x}|)$$

Note that

$$\begin{aligned} \partial L_{\mathcal{D}_2}(\mathbf{w}) &= \frac{1}{2^d \sqrt{d}} \sum_{\mathbf{x} \in \mathcal{X}_2} \left( \frac{1}{2} + \delta \right) (-\mathbf{x} - \text{sign}(1 - \mathbf{w}^\top \mathbf{x}) \cdot \mathbf{x}) + \left( \frac{1}{2} - \delta \right) (\mathbf{x} + \text{sign}(1 + \mathbf{w}^\top \mathbf{x}) \cdot \mathbf{x}) \\ &= \frac{1}{2^d \sqrt{d}} \sum_{\mathbf{x} \in \mathcal{X}_2} -2\delta \mathbf{x} - \left( \frac{1}{2} + \delta \right) \text{sign}(1 - \mathbf{w}^\top \mathbf{x}) \cdot \mathbf{x} + \left( \frac{1}{2} - \delta \right) \text{sign}(1 + \mathbf{w}^\top \mathbf{x}) \cdot \mathbf{x} \\ &= \frac{1}{\sqrt{d}} \left( -\frac{\delta}{2} \mathbf{1}_d - \frac{1}{2^d} \sum_{\mathbf{x} \in \mathcal{X}_2} \left( \frac{1}{2} + \delta \right) \text{sign}(1 - \mathbf{w}^\top \mathbf{x}) \cdot \mathbf{x} + \left( \frac{1}{2} - \delta \right) \text{sign}(1 + \mathbf{w}^\top \mathbf{x}) \cdot \mathbf{x} \right) \end{aligned}$$

Let  $\mathcal{X}^* = \{\mathbf{x} : \|\mathbf{x}\|_1 = d-1, \mathbf{x} \in \mathcal{X}_2\}$ , and let  $\mathbf{w}_2^* = \frac{1}{d-1} \mathbf{1}_d$ . Taken together, we see that

$$\begin{aligned} \partial L_{\mathcal{D}_2}(\mathbf{w}_2^*) &= \frac{1}{\sqrt{d}} \left( -\frac{\delta}{2} \mathbf{1}_d - \frac{1}{2^d} \sum_{\mathbf{x} \in \mathcal{X}^*} \left( \frac{1}{2} + \delta \right) \text{sign}(1 - \frac{1}{d-1} \mathbf{1}_d^\top \mathbf{x}) \cdot \mathbf{x} \right. \\ &\quad \left. - \frac{1}{2^d} \sum_{\mathbf{x} \in \mathcal{X}_2 \setminus \mathcal{X}^*} \left( \frac{1}{2} + \delta \right) \text{sign}(1 - \frac{1}{d-1} \mathbf{1}_d^\top \mathbf{x}) \cdot \mathbf{x} \right. \\ &\quad \left. + \frac{1}{2^d} \sum_{\mathbf{x} \in \mathcal{X}_2} \left( \frac{1}{2} - \delta \right) \text{sign}(1 + \frac{1}{d-1} \mathbf{1}_d^\top \mathbf{x}) \cdot \mathbf{x} \right) \\ &= \frac{1}{\sqrt{d}} \left( -\frac{\delta}{2} \mathbf{1}_d - \frac{d}{2^d} \left( \frac{1}{2} + \delta \right) \text{sign}(0) \cdot \mathbf{1}_d - \left( \frac{1}{4} - \frac{d}{2^d} \right) \left( \frac{1}{2} + \delta \right) \cdot \mathbf{1}_d + \frac{1}{4} \left( \frac{1}{2} - \delta \right) \cdot \mathbf{1}_d \right) \\ &= \frac{1}{\sqrt{d}} \left( -\delta + (1 - \text{sign}(0)) \left( \frac{d(1+2\delta)}{2^{d+1}} \right) \right) \cdot \mathbf{1}_d \end{aligned}$$

Since  $\delta = \frac{1}{2^{d+1}}$ , and letting  $\text{sign}(0) = 1$ , we have that

$$\mathbf{h}^- = -\frac{1}{2^{d+1}\sqrt{d}} \cdot \mathbf{1}_d \in \partial L_{\mathcal{D}_2}(\mathbf{w}_2^*).$$

Furthermore, when  $\text{sign}(0) = -1$ , we have

$$\mathbf{h}^+ = \frac{1}{\sqrt{d}} \left( \frac{2d-1}{2^{d+1}} + \frac{d}{4^d} \right) \cdot \mathbf{1}_d \in \partial L_{\mathcal{D}_2}(\mathbf{w}_2^*).$$

Since  $\mathbf{0}_d$  can be written as a convex combination of  $\mathbf{h}^-$  and  $\mathbf{h}^+$ , we know that  $\mathbf{w}_2^*$  is a minimizer of  $L_{\mathcal{D}_2}(\mathbf{w})$ . Since  $d \geq 4$ , we also know that, for all  $\mathbf{y} \in \text{dom } L_{\mathcal{D}_2}$ ,

$$L_{\mathcal{D}_2}(\mathbf{y}) - L_{\mathcal{D}_2}(\mathbf{w}_2^*) \geq \frac{1}{2^{d+1}\sqrt{d}} \cdot \mathbf{1}_d^\top (\mathbf{y} - \mathbf{w}_2^*)$$

and

$$L_{\mathcal{D}_2}(\mathbf{y}) - L_{\mathcal{D}_2}(\mathbf{w}_2^*) \geq -\frac{1}{2^{d+1}\sqrt{d}} \cdot \mathbf{1}_d^\top (\mathbf{y} - \mathbf{w}_2^*)$$

which taken together implies that

$$L_{\mathcal{D}_2}(\mathbf{y}) - L_{\mathcal{D}_2}(\mathbf{w}_2^*) \geq \left| \frac{1}{2^{d+1}\sqrt{d}} \cdot \mathbf{1}_d^\top (\mathbf{y} - \mathbf{w}_2^*) \right|.$$

Again, letting  $S_2 = \left\{ \mathbf{w} : \left| \frac{1}{2^{d+1}\sqrt{d}} \cdot \mathbf{1}_d^\top (\mathbf{w} - \mathbf{w}_2^*) \right| \leq \varepsilon \right\}$ , we see that the entire set of  $\varepsilon$ -optimal classifiers for  $L_{\mathcal{D}_2}$  is contained in  $S_2$ .  $\square$

We can now prove Theorem 5.

*Proof of Theorem 5.* Having proved that  $S_1$  and  $S_2$  contain the  $\varepsilon$ -optimal classifiers for  $L_{\mathcal{D}_1}$  and  $L_{\mathcal{D}_2}$ , respectively, we now aim to show that for  $\varepsilon < \frac{1}{2^{d+2}d^{3/2}}$ , these sets are disjoint. Observe that for any  $\mathbf{w} \in S_1$ ,

$$\left| \frac{1}{2^{d+1}\sqrt{d}} \cdot \mathbf{1}_d^\top (\mathbf{w} - \mathbf{w}_1^*) \right| \leq \frac{1}{2^{d+2}d^{3/2}} \Rightarrow \frac{1}{2^{d+1}} \cdot \mathbf{1}_d^\top (\mathbf{w} - \mathbf{w}_1^*) \leq \frac{1}{2^{d+2}d} \Rightarrow \mathbf{1}_d^\top \mathbf{w} \leq 1 + \frac{1}{2d}.$$

On the other hand, for any  $\mathbf{w} \in S_2$ ,

$$\begin{aligned} \left| \frac{1}{2^{d+1}\sqrt{d}} \cdot \mathbf{1}_d^\top (\mathbf{w} - \mathbf{w}_2^*) \right| \leq \frac{1}{2^{d+2}d^{3/2}} &\Rightarrow -\frac{1}{2^{d+1}} \cdot \mathbf{1}_d^\top (\mathbf{w} - \mathbf{w}_2^*) \leq \frac{1}{2^{d+2}d} \\ &\Rightarrow \mathbf{1}_d^\top \mathbf{w} \geq \frac{d}{d-1} - \frac{1}{2d} = 1 + \frac{d+1}{2d(d-1)} > 1 + \frac{1}{2d}, \end{aligned}$$

and so we see that no  $\mathbf{w}$  can exist in both  $S_1$  and  $S_2$ , which means we may conclude that the sets are disjoint.  $\square$

### A.3 Proof of Corollary 2

*Proof.* Suppose  $0 < \varepsilon < \frac{1}{64}$ . Let  $\mathcal{X}_1, \mathcal{X}_2$  be the same as in the previous proof, let  $\mathcal{X}'_1 = \frac{1}{\sqrt{2}}\mathcal{X}_1$  and  $\mathcal{X}'_2 = \frac{1}{\sqrt{2}}\mathcal{X}_2$ , and let  $\mathcal{D}'_1$  and  $\mathcal{D}'_2$  be uniform distributions over  $\mathcal{X}'_1 \times \{\frac{1}{\sqrt{2}}\}$  and  $\mathcal{X}'_2 \times \{\frac{1}{\sqrt{2}}\}$ , respectively. Again, any learner observing  $k < 2$  attributes cannot distinguish between the distributions. Note that  $L_{\mathcal{D}'_1}(\mathbf{w}) = \frac{1}{2}L_{\mathcal{D}_1}(\mathbf{w})$  and  $L_{\mathcal{D}'_2}(\mathbf{w}) = \frac{1}{2}L_{\mathcal{D}_2}(\mathbf{w})$ .

The set of  $\varepsilon$ -optimal regressors for  $L_{\mathcal{D}'_1}$  is  $S_1 = \{\mathbf{w} : |\mathbf{w}^\top \mathbf{1}_2 - 1| \leq 2\sqrt{2\varepsilon}\}$ , and for  $L_{\mathcal{D}'_2}$  the set is  $S_2 = \{\mathbf{w} : \|\mathbf{w} - \mathbf{1}_2\|_2 \leq 2\sqrt{2\varepsilon}\}$ . Thus, for  $\varepsilon < \frac{1}{64}$ ,  $S_1$  and  $S_2$  are disjoint sets by the reasoning in the proof of Theorem 1, and so a learner can distinguish between the two sets, which is a contradiction.  $\square$

### A.4 Proof of Corollary 4

*Proof.* Let  $\mathcal{X}_1$  and  $\mathcal{X}_2$  be the same as described in the proof of Theorem 3, and let  $\mathcal{X}'_1 = \frac{1}{\sqrt{d}}\mathcal{X}_1$  and  $\mathcal{X}'_2 = \frac{1}{\sqrt{d}}\mathcal{X}_2$ . Let  $\mathcal{D}'_1$  and  $\mathcal{D}'_2$  be uniform distributions over  $\mathcal{X}'_1 \times \{\frac{1}{\sqrt{d}}\}$  and  $\mathcal{X}'_2 \times \{\frac{1}{\sqrt{d}}\}$ , respectively. Note that  $L_{\mathcal{D}'_1}(\mathbf{w}) = \frac{1}{\sqrt{d}}L_{\mathcal{D}_1}(\mathbf{w})$  and  $L_{\mathcal{D}'_2}(\mathbf{w}) = \frac{1}{\sqrt{d}}L_{\mathcal{D}_2}(\mathbf{w})$ . Scaling the function does not change the minimizer, so most of the proof of Theorem 3 still holds. The main difference is that the subgradient set is scaled by  $\frac{1}{\sqrt{d}}$ , which leads to an additional  $\frac{1}{\sqrt{d}}$  factor in the precision bound.  $\square$

## B Analysis of Algorithm 1

To prove Theorem 8, we first need a few intermediate lemmas.

**Lemma 12.** *For all  $t \in [m]$  it holds that  $\mathbb{E}_t[\|\hat{\mathbf{g}}_t\|_2^2] \leq H^2$ .*

*Proof.* We have  $\mathbb{E}_t[\|\hat{\mathbf{g}}_t\|_2^2] = \mathbb{E}_t[\|\ell'(\mathbf{w}_t^\top \tilde{\mathbf{x}}_t - y_t) \cdot \tilde{\mathbf{x}}_t\|_2^2] \leq H^2 \mathbb{E}_t[\|\tilde{\mathbf{x}}_t\|_2^2] \leq H^2$ .  $\square$

**Lemma 13.** *Let  $\ell_t(\mathbf{w}) := \ell(\mathbf{w}^\top \mathbf{x}_t - y_t)$ , where  $\ell : \mathbb{R} \mapsto \mathbb{R}$  is a convex,  $H$ -Lipschitz function defined over the entire real line, and let  $\tilde{\ell}_t(\mathbf{w}) = \mathbb{E}_{\tilde{\mathbf{x}}_t}[\ell(\mathbf{w}^\top \tilde{\mathbf{x}}_t - y_t)]$ . Then, for all  $\mathbf{w}$ ,*

$$|\ell_t(\mathbf{w}) - \tilde{\ell}_t(\mathbf{w})| \leq HB\sqrt{1 - \frac{k}{d}}.$$

*Proof.* Note that  $|\ell_t(\mathbf{w}) - \tilde{\ell}_t(\mathbf{w})| = |\mathbb{E}_{\tilde{\mathbf{x}}_t}[\ell(\mathbf{w}^\top \mathbf{x}_t - y_t) - \ell(\mathbf{w}^\top \tilde{\mathbf{x}}_t - y_t)]|$ . By Jensen's inequality we have

$$\left| \mathbb{E}_{\tilde{\mathbf{x}}_t}[\ell(\mathbf{w}^\top \mathbf{x}_t - y_t) - \ell(\mathbf{w}^\top \tilde{\mathbf{x}}_t - y_t)] \right| \leq \mathbb{E}_{\tilde{\mathbf{x}}_t} \left[ |\ell(\mathbf{w}^\top \mathbf{x}_t - y_t) - \ell(\mathbf{w}^\top \tilde{\mathbf{x}}_t - y_t)| \right].$$

Observe that, since  $\|\mathbf{x}_t\|_2 \leq 1$  and for any coordinate  $i \in [d]$ ,  $\mathbb{E}_{\tilde{\mathbf{x}}_t}[\tilde{\mathbf{x}}_t[i]] = \frac{k}{d} \mathbf{x}_t[i]$ ,

$$\begin{aligned} \mathbb{E}_{\tilde{\mathbf{x}}_t}[\|\mathbf{x}_t - \tilde{\mathbf{x}}_t\|_2] &\leq \left( \mathbb{E}_{\tilde{\mathbf{x}}_t} \left[ \sum_{i=1}^d (\mathbf{x}_t[i] - \tilde{\mathbf{x}}_t[i])^2 \right] \right)^{\frac{1}{2}} = \left( \sum_{i=1}^d \mathbf{x}_t[i]^2 - \frac{2k}{d} \mathbf{x}_t[i]^2 + \mathbb{E}_{\tilde{\mathbf{x}}_t}[\tilde{\mathbf{x}}_t[i]^2] \right)^{\frac{1}{2}} \\ &\leq \left( \sum_{i=1}^d \left( 1 - \frac{k}{d} \right) \mathbf{x}_t[i]^2 \right)^{\frac{1}{2}} \\ &\leq \sqrt{1 - \frac{k}{d}}. \end{aligned}$$

Along with the fact that  $\ell$  is  $H$ -Lipschitz, this gives us

$$\begin{aligned} \mathbb{E}_{\tilde{\mathbf{x}}_t} \left[ |\ell(\mathbf{w}^\top \mathbf{x}_t - y_t) - \ell(\mathbf{w}^\top \tilde{\mathbf{x}}_t - y_t)| \right] &\leq H \cdot \mathbb{E}_{\tilde{\mathbf{x}}_t} \left[ \|\mathbf{w}^\top (\mathbf{x}_t - \tilde{\mathbf{x}}_t)\|_2 \right] \\ &\leq H \cdot \|\mathbf{w}\|_2 \mathbb{E}_{\tilde{\mathbf{x}}_t} \left[ \|\mathbf{x}_t - \tilde{\mathbf{x}}_t\|_2 \right] \\ &\leq HB\sqrt{1 - \frac{k}{d}}. \end{aligned} \quad \square$$

**Lemma 14.** *Let  $\ell_t(\mathbf{w}) := \ell(y_t \cdot \mathbf{w}^\top \mathbf{x}_t)$ , where  $\ell : \mathbb{R} \mapsto \mathbb{R}$  is a convex,  $H$ -Lipschitz function defined over the entire real line, and let  $\tilde{\ell}_t(\mathbf{w}) = \mathbb{E}_{\tilde{\mathbf{x}}_t}[\ell(y_t \cdot \mathbf{w}^\top \tilde{\mathbf{x}}_t)]$ . Then, for all  $\mathbf{w}$ ,*

$$|\ell_t(\mathbf{w}) - \tilde{\ell}_t(\mathbf{w})| \leq HB^2\sqrt{1 - \frac{k}{d}}.$$

*Proof.* Note that  $|\ell_t(\mathbf{w}) - \tilde{\ell}_t(\mathbf{w})| = |\mathbb{E}_{\tilde{\mathbf{x}}_t}[\ell(y_t \cdot \mathbf{w}^\top \mathbf{x}_t) - \ell(y_t \cdot \mathbf{w}^\top \tilde{\mathbf{x}}_t)]|$ . By Jensen's inequality we have

$$\left| \mathbb{E}_{\tilde{\mathbf{x}}_t}[\ell(y_t \cdot \mathbf{w}^\top \mathbf{x}_t) - \ell(y_t \cdot \mathbf{w}^\top \tilde{\mathbf{x}}_t)] \right| \leq \mathbb{E}_{\tilde{\mathbf{x}}_t} \left[ |\ell(y_t \cdot \mathbf{w}^\top \mathbf{x}_t) - \ell(y_t \cdot \mathbf{w}^\top \tilde{\mathbf{x}}_t)| \right].$$

Using the fact that  $\mathbb{E}_{\tilde{\mathbf{x}}_t}[\|\mathbf{x}_t - \tilde{\mathbf{x}}_t\|_2] \leq \sqrt{1 - \frac{k}{d}}$  from the proof of Lemma 13, with the fact that  $\ell$  is  $H$ -Lipschitz, we have

$$\begin{aligned} \mathbb{E}_{\tilde{\mathbf{x}}_t} \left[ |\ell(y_t \cdot \mathbf{w}^\top \mathbf{x}_t) - \ell(y_t \cdot \mathbf{w}^\top \tilde{\mathbf{x}}_t)| \right] &\leq H \cdot \mathbb{E}_{\tilde{\mathbf{x}}_t} \left[ \|y_t \cdot \mathbf{w}^\top (\mathbf{x}_t - \tilde{\mathbf{x}}_t)\|_2 \right] \\ &\leq HB \cdot \|\mathbf{w}\|_2 \mathbb{E}_{\tilde{\mathbf{x}}_t} \left[ \|\mathbf{x}_t - \tilde{\mathbf{x}}_t\|_2 \right] \\ &\leq HB^2\sqrt{1 - \frac{k}{d}}. \end{aligned} \quad \square$$

Having proven the lemmas, we proceed to prove Theorem 8.

*Proof.* For the regression case, let  $\tilde{\ell}_t(\mathbf{w}) = \mathbb{E}_{\tilde{\mathbf{x}}_t}[\ell(\mathbf{w}^\top \tilde{\mathbf{x}}_t - y_t)]$ , where the expectation is over the random choice of indices in the construction of  $\tilde{\mathbf{x}}_t$ . For the classification case, let  $\tilde{\ell}_t(\mathbf{w}) = \mathbb{E}_{\tilde{\mathbf{x}}_t}[\ell(y_t \cdot \mathbf{w}^\top \tilde{\mathbf{x}}_t)]$ . Note that in either case,  $\nabla \tilde{\ell}_t(\mathbf{w}_t) = \mathbb{E}_{\tilde{\mathbf{x}}_t}[\hat{\phi}_t \cdot \tilde{\mathbf{x}}_t] = \mathbb{E}_{\tilde{\mathbf{x}}_t}[\hat{\mathbf{g}}_t]$ . From the standard OGD analysis [13] applied to  $\hat{\mathbf{g}}_1, \dots, \hat{\mathbf{g}}_m$ , we see that

$$\sum_{t=1}^m \hat{\mathbf{g}}_t^\top (\mathbf{w}_t - \mathbf{w}^*) \leq \frac{2B^2}{\eta} + \frac{\eta}{2} \sum_{t=1}^m \|\hat{\mathbf{g}}_t\|_2^2. \quad (1)$$

Let  $\mathbb{E}_t[\cdot]$  be the conditional expectation with respect to the randomness up to time  $t$ , and let  $G^2 := \max_t \mathbb{E}_t[\|\hat{\mathbf{g}}_t\|_2^2]$ . After taking the expectation of Eq. (1) with respect to the randomness in the algorithm, we have

$$\mathbb{E} \left[ \sum_{t=1}^m \nabla \tilde{\ell}_t(\mathbf{w}_t)^\top (\mathbf{w}_t - \mathbf{w}^*) \right] \leq \frac{2B^2}{\eta} + \frac{\eta}{2} G^2 m.$$

Since  $\tilde{\ell}_t(\mathbf{w})$  is convex, we have  $\tilde{\ell}_t(\mathbf{w}_t) - \tilde{\ell}_t(\mathbf{w}^*) \leq \nabla \tilde{\ell}_t(\mathbf{w})^\top (\mathbf{w}_t - \mathbf{w}^*)$ . After choosing  $\eta = \frac{2B}{G\sqrt{m}}$  and rearranging, we have

$$\mathbb{E} \left[ \sum_{t=1}^m \tilde{\ell}_t(\mathbf{w}_t) \right] \leq \sum_{t=1}^m \tilde{\ell}_t(\mathbf{w}^*) + 2BG\sqrt{m}.$$

Note that by Lemma 12,  $G \leq H$ . After dividing through by  $m$  we have

$$\mathbb{E} \left[ \frac{1}{m} \sum_{t=1}^m \tilde{\ell}_t(\mathbf{w}_t) \right] \leq \frac{1}{m} \sum_{t=1}^m \tilde{\ell}_t(\mathbf{w}^*) + \frac{2HB}{\sqrt{m}}.$$

Let  $\tilde{B} = \max\{B, 1\}$ . By Lemmas 13 and 14, this implies that

$$\mathbb{E} \left[ \frac{1}{m} \sum_{t=1}^m \ell_t(\mathbf{w}_t) \right] \leq \frac{1}{m} \sum_{t=1}^m \ell_t(\mathbf{w}^*) + \frac{2HB}{\sqrt{m}} + 2H\tilde{B}^2 \sqrt{1 - \frac{k}{d}}.$$

Taking the expectation with respect to the random choice of the data set, we have

$$\mathbb{E} \left[ \frac{1}{m} \sum_{t=1}^m L_{\mathcal{D}}(\mathbf{w}_t) \right] \leq L_{\mathcal{D}}(\mathbf{w}^*) + \frac{2HB}{\sqrt{m}} + 2H\tilde{B}^2 \sqrt{1 - \frac{k}{d}}.$$

After applying Jensen's inequality, we have

$$\mathbb{E}[L_{\mathcal{D}}(\hat{\mathbf{w}})] \leq L_{\mathcal{D}}(\mathbf{w}^*) + \frac{2HB}{\sqrt{m}} + 2H\tilde{B}^2 \sqrt{1 - \frac{k}{d}}. \quad \square$$
